# Supplementary material for: Evaluation of the efficacy of carbon nanotubes for delivering peptides into mitochondria
Source: Royal Society of Chemistry journal article supplement (doi:10.1039/c6ra14254k), 2016-01-01
Supplement: c6ra14254k1.pdf [file c6ra14254k1.pdf]

## Supplementary Figures

### Evaluation of the efficacy of carbon nanotubes for delivering peptides into mitochondria

Graziella Ficociello, Adele Salemme, Daniela Uccelletti, Silvana Fiorito, Anna Rita Togna, Lorenzo Vallan, Jose M González-Domínguez, Tatiana Da Ros, Silvia Francisci, Arianna Montanari

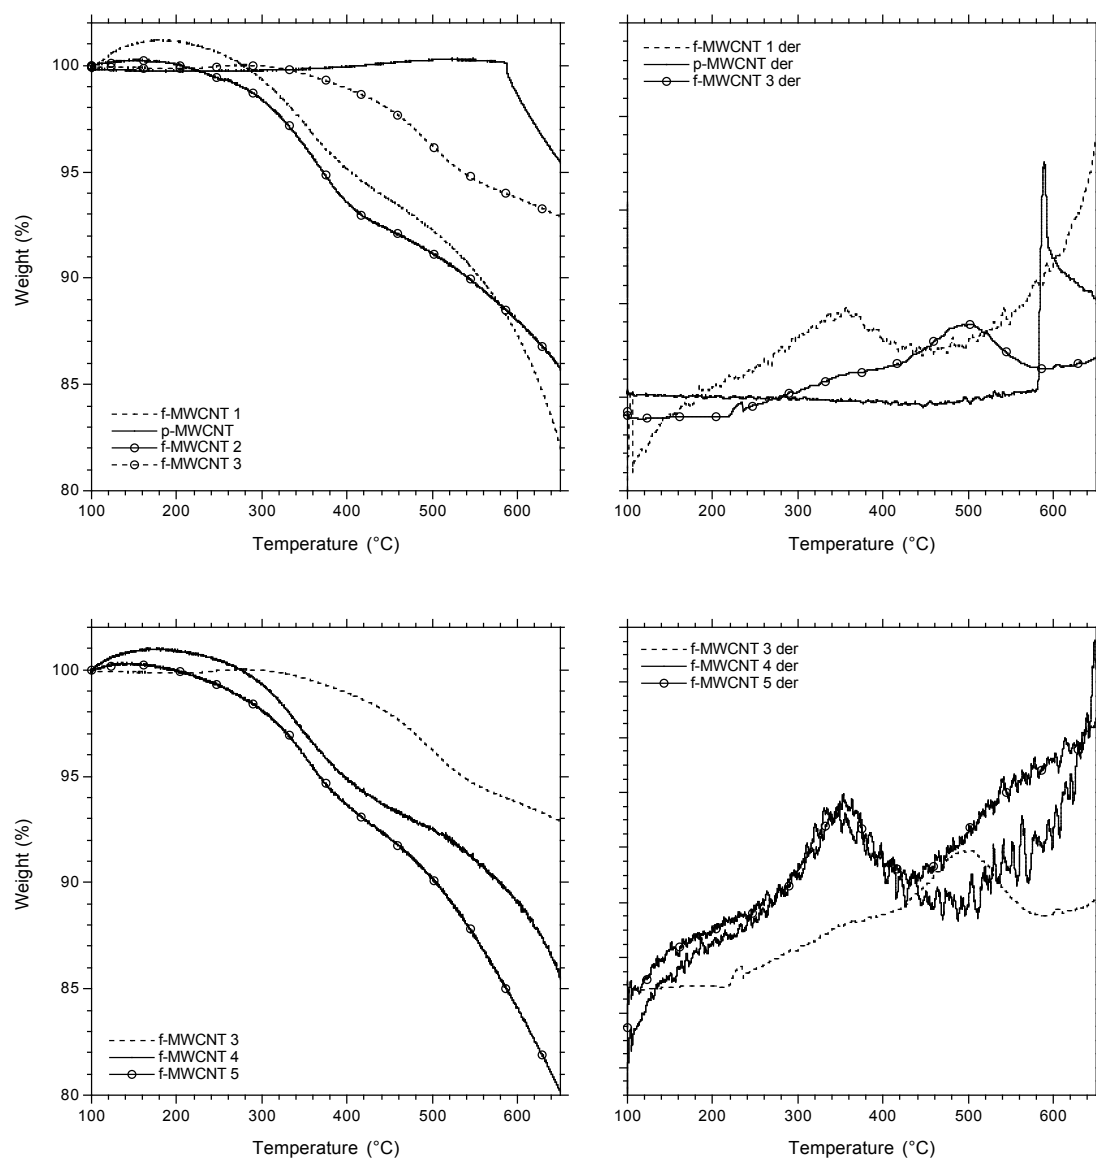

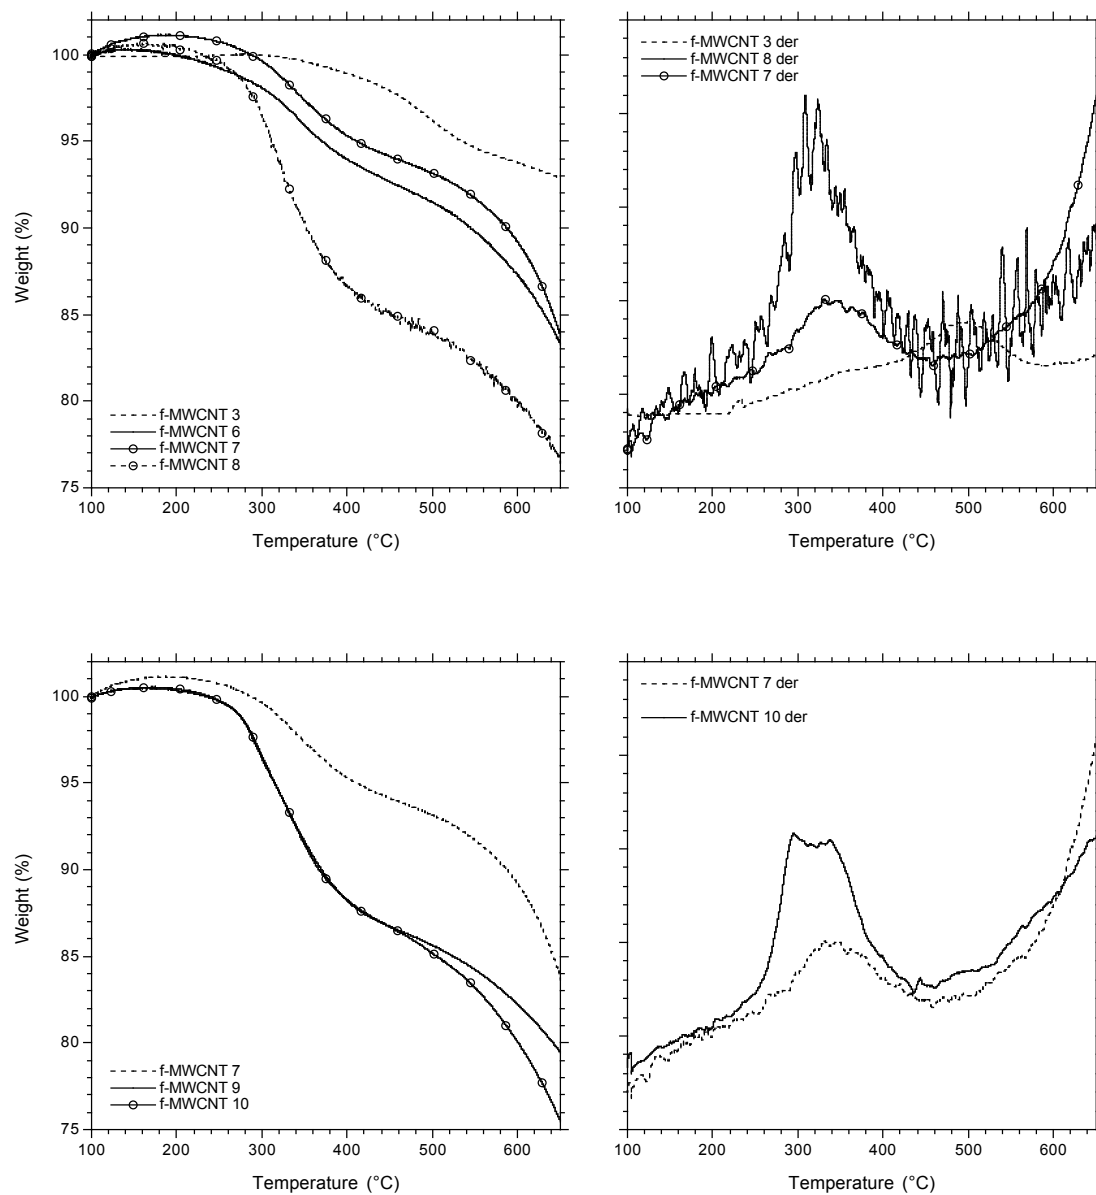

**Fig. S1:** TGA analyses and derivatives of all compounds.

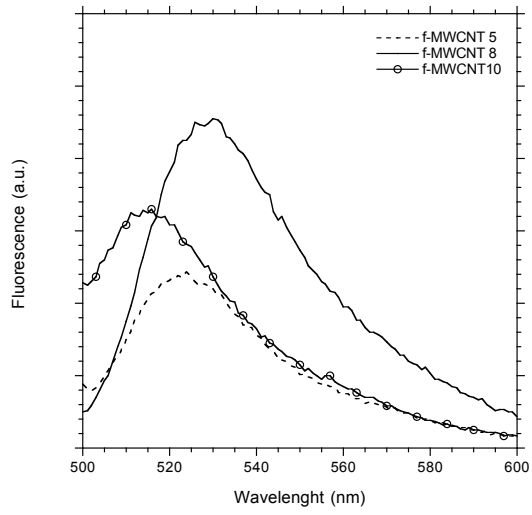

**Fig. S2:** Fluorescence of *f*-MWCNT 5, 8, 10 in water.
